# Supplementary material for: Protective Effects of Dietary Resveratrol against Chronic Low-Grade Inflammation Mediated through the Gut Microbiota in High-Fat Diet Mice
Source: MDPI journal article supplement (doi:10.3390/nu14101994), 2022-05-10
Supplement: s1 [file supplement table total.pdf › nutrients-1668995 - Updated Supplementary Material/supplement table total.pdf]

**Table S1. The composition of experimental diets**

| Ingredient                            | Standard Diet |       | High-fat Diet |       |
|---------------------------------------|---------------|-------|---------------|-------|
|                                       | g%            | kcal% | g%            | kcal% |
| Casein, 30 Mesh                       | 18.96         | 19.72 | 25.85         | 19.72 |
| L-Cystine                             | 0.28          | 0.30  | 0.39          | 0.30  |
| Corn Starch                           | 29.86         | 31.06 | 0.00          | 0.00  |
| Maltodextrin 10                       | 3.32          | 3.45  | 16.15         | 12.32 |
| Sucrose                               | 33.18         | 34.51 | 8.89          | 6.78  |
| Cellulose, BW200                      | 4.74          | 0     | 6.46          | 0.00  |
| Soybean Oil                           | 2.37          | 5.55  | 3.23          | 5.55  |
| Lard                                  | 1.90          | 4.44  | 31.66         | 54.35 |
| Mineral Mix S10026                    | 0.95          | 0     | 1.29          | 0.00  |
| DiCalcium Phosphate                   | 1.23          | 0     | 1.68          | 0.00  |
| Calcium Carbonate                     | 0.52          | 0     | 0.71          | 0.00  |
| Potassium Citrate, 1 H <sub>2</sub> O | 1.56          | 0     | 2.13          | 0.00  |
| Vitamin Mix V10001                    | 0.95          | 1     | 1.29          | 0.99  |
| Choline Bitartrate                    | 0.19          | 0     | 0.26          | 0.00  |
| Energy (kcal/g diet)                  | 3.85          |       | 5.24          |       |

**Table S2. The sequences of primers used in Realtime PCR assays**

| Genes         | Forward Primer                | Reverse Primer               |
|---------------|-------------------------------|------------------------------|
| IL6           | 5'-CCGGAGAGGAGACTTCAC-3'      | 5'-TCCACGATTTCCCAGAG-3'      |
| IL-1 $\beta$  | 5'-TTGAAGAAGAGCCCATCCTC-3'    | 5'-CAGCTCATATGGGTCCGAC-3'    |
| TNF- $\alpha$ | 5'-TAGCCAGGAGGGAGAACAGA-3'    | 5'-TTTTCTGGAGGGAGATGTGG-3'   |
| MCP-1         | 5'-TTAAAAACCTGGATCGGAACCAA-3' | 5'-GCATTAGCTTCAGATTACGGGT-3' |

**Table S3. Effect of RSV administration on obesity-related parameters**

Data are expressed as the mean $\pm$ S.E.M. (n=12). Statistical analysis was performed using ANOVA. The

| Variables/Groups                    | SD                            | HFD                           | HFDR                          |
|-------------------------------------|-------------------------------|-------------------------------|-------------------------------|
| Final body weight (g)               | 27.94 $\pm$ 0.27 <sup>b</sup> | 35.58 $\pm$ 1.28 <sup>a</sup> | 29.41 $\pm$ 0.22 <sup>b</sup> |
| Weight gain (g)                     | 6.13 $\pm$ 0.19 <sup>b</sup>  | 14.49 $\pm$ 1.09 <sup>a</sup> | 8.18 $\pm$ 0.34 <sup>b</sup>  |
| Mean energy intake (Kcal/day/mouse) | 10.86 $\pm$ 0.15 <sup>b</sup> | 14.07 $\pm$ 0.27 <sup>a</sup> | 14.09 $\pm$ 0.27 <sup>a</sup> |
| Energy efficiency (g/Kcal)          | 0.42 $\pm$ 0.01 <sup>b</sup>  | 0.49 $\pm$ 0.01 <sup>a</sup>  | 0.52 $\pm$ 0.01 <sup>a</sup>  |
| Epi-WAT/body weight (%)             | 0.89 $\pm$ 0.05 <sup>c</sup>  | 3.99 $\pm$ 0.20 <sup>a</sup>  | 2.09 $\pm$ 0.1 <sup>b</sup>   |
| Per-WAT/body weight (%)             | 0.14 $\pm$ 0.01 <sup>c</sup>  | 1.50 $\pm$ 0.06 <sup>a</sup>  | 0.64 $\pm$ 0.08 <sup>b</sup>  |
| Ing-WAT/body weight (%)             | 0.52 $\pm$ 0.05 <sup>c</sup>  | 1.49 $\pm$ 0.07 <sup>a</sup>  | 0.92 $\pm$ 0.07 <sup>b</sup>  |
| BAT/body weight (%)                 | 0.45 $\pm$ 0.08 <sup>b</sup>  | 0.44 $\pm$ 0.02 <sup>b</sup>  | 0.83 $\pm$ 0.05 <sup>a</sup>  |

means with different superscripts are considered significantly different (P<0.05), with the same letter correspond to results that show no statistically significant differences. Epi-WAT: epididymal white adipose tissue; Per-WAT:

perirenal white adipose tissue; Ing-WAT: Inguinal white adipose tissue; BAT: interscapular brown adipose tissue.

**Table S4. Serum biochemical analyses from mice in SD, HFD and HFDR groups**

|                          | SD                       | HFD                      | HFDR                     |
|--------------------------|--------------------------|--------------------------|--------------------------|
| Fasting glucose (mmol/L) | 6.11±0.12 <sup>b</sup>   | 7.80±0.18 <sup>a</sup>   | 6.53±0.11 <sup>b</sup>   |
| Insulin (ng/mL)          | 0.60±0.03 <sup>b</sup>   | 1.09±0.03 <sup>a</sup>   | 0.91±0.02 <sup>c</sup>   |
| Serum TC(mmol/L)         | 2.74±0.07 <sup>c</sup>   | 4.18±0.07 <sup>a</sup>   | 3.53±0.05 <sup>b</sup>   |
| Serum TG(mmol/L)         | 0.24±0.02 <sup>b</sup>   | 0.42±0.03 <sup>a</sup>   | 0.25±0.03 <sup>b</sup>   |
| Serum HDL(mmol/L)        | 2.37±0.05 <sup>c</sup>   | 3.22±0.05 <sup>a</sup>   | 2.91±0.04 <sup>b</sup>   |
| Serum LDL(mmol/L)        | 0.49±0.01 <sup>c</sup>   | 1.30±0.03 <sup>a</sup>   | 0.69±0.01 <sup>b</sup>   |
| ALT(U/L)                 | 25.68±1.08 <sup>c</sup>  | 46.69±1.40 <sup>a</sup>  | 32.75±1.74 <sup>b</sup>  |
| AST(U/L)                 | 105.88±7.01 <sup>b</sup> | 132.25±4.59 <sup>a</sup> | 111.00±2.94 <sup>b</sup> |

Data are expressed as the mean±S.E.M. (n=8). Statistical analysis was performed using ANOVA. The means with different superscripts are considered significantly different (P<0.05), with the same letter correspond to results that show no statistically significant differences.

**Table S5. Effect of FMT administration on obesity-related parameters**

Data are expressed as mean±S.E.M. (n=6). Differences were assessed by unpaired Student's t tests. The means with different superscripts are considered significantly different (P<0.05), with the same letter correspond to results that show no statistically significant differences. Epi-WAT: epididymal white adipose tissue; Per-WAT:

| Variables/Groups                    | HFD→HFD                 | HFDR→HFD                |
|-------------------------------------|-------------------------|-------------------------|
| Final body weight (g)               | 35.24±0.37 <sup>a</sup> | 31.26±0.47 <sup>b</sup> |
| Weight gain (g)                     | 14.03±0.17 <sup>a</sup> | 9.48±0.37 <sup>b</sup>  |
| Mean energy intake (Kcal/day/mouse) | 14.03±0.39 <sup>a</sup> | 14.13±0.2 <sup>a</sup>  |
| Energy efficiency (g/Kcal)          | 1.54±0.13 <sup>a</sup>  | 1.18±0.12 <sup>a</sup>  |
| Epi-WAT/body weight (%)             | 3.74±0.48 <sup>a</sup>  | 1.98±0.15 <sup>b</sup>  |
| Per-WAT/body weight (%)             | 1.58±0.24 <sup>a</sup>  | 1.03±0.07 <sup>b</sup>  |
| Ing-WAT/body weight (%)             | 1.54±0.13 <sup>a</sup>  | 1.18±0.12 <sup>b</sup>  |
| BAT/body weight %)                  | 0.48±0.02 <sup>b</sup>  | 0.72±0.06 <sup>a</sup>  |

perirenal white adipose tissue; Ing-WAT: Inguinal white adipose tissue; BAT: interscapular brown adipose tissue.

**Table S6. Effect of FMT on serum biochemical parameters in C56BL/6 mice**

|                   | HFD→HFD                   | HFDR→HFD                |
|-------------------|---------------------------|-------------------------|
| Serum TC(mmol/L)  | 4.25±0.17 <sup>a</sup>    | 3.91±0.27 <sup>b</sup>  |
| Serum TG(mmol/L)  | 0.81±0.11 <sup>a</sup>    | 0.61±0.09 <sup>b</sup>  |
| Serum HDL(mmol/L) | 3.11±0.33 <sup>a</sup>    | 3.22±0.12 <sup>a</sup>  |
| Serum LDL(mmol/L) | 1.38±0.14 <sup>a</sup>    | 1.36±0.11 <sup>a</sup>  |
| TC/HDL            | 1.40                      | 1.29                    |
| ALT(U/L)          | 67.00±5.76 <sup>a</sup>   | 52.83±5.85 <sup>b</sup> |
| AST(U/L)          | 139.17±10.22 <sup>a</sup> | 118.2±8.13 <sup>b</sup> |

Data are expressed as mean±S.E.M. (n=6). Differences were assessed by unpaired Student's t tests. The means with different superscripts are considered significantly different (P<0.05), with the same letter correspond to results that show no statistically significant differences.

**Table S7. The Reads and OTU numbers of intestinal bacteria**

Data are expressed as mean±S.E.M. (n=6). Statistical analysis was performed using ANOVA. The means

|          | Raw Reads                | Qualified Reads         | Average length           | OTUs                     |
|----------|--------------------------|-------------------------|--------------------------|--------------------------|
| SD       | 102605±2843 <sup>a</sup> | 84693±2424 <sup>a</sup> | 423±0.258 <sup>a</sup>   | 386.3±11.07 <sup>a</sup> |
| HFD      | 101393±1638 <sup>a</sup> | 84914±1440 <sup>a</sup> | 416.20±0.55 <sup>a</sup> | 399.60±7.24 <sup>a</sup> |
| HFDR     | 99839±1848 <sup>a</sup>  | 83285±1487 <sup>a</sup> | 417.40±0.85 <sup>a</sup> | 395.00±8.50 <sup>a</sup> |
| HFD→HFD  | 98866±1611 <sup>a</sup>  | 82974±1402 <sup>a</sup> | 417.10±0.53 <sup>a</sup> | 403.80±7.78 <sup>a</sup> |
| HFDR→HFD | 101717±1815 <sup>a</sup> | 85382±1499 <sup>a</sup> | 415.10±0.80 <sup>a</sup> | 404.80±6.45 <sup>a</sup> |

with different superscripts are considered significantly different (P<0.05), with the same letter correspond to results that show no statistically significant differences.
